# Supplementary material for: Effectiveness of film as a health communication tool to improve perceptions and attitudes in multiple sclerosis
Source: PubMed Central journal article supplement — Mult Scler J Exp Transl Clin. 2021 Feb 27;7(1):2055217321995947. doi: 10.1177/2055217321995947 (PMC7923991; doi:10.1177/2055217321995947), 2021-02-27
Supplement: sj-pdf-2-mso-10.1177_2055217321995947.pdf [file sj-pdf-2-mso-10.1177_2055217321995947.pdf]

Supplement Table 1: Perceived causes of MS derived from free responses

| n=215          | Environmental | Sociocultural | Biological |
|----------------|---------------|---------------|------------|
| Response, n, % | 129 (60.0)    | 38 (17.7)     | 48 (22.3)  |
